# Supplementary material
Source: PubMed Central journal article supplement (PMC9262832)
Supplement: NIHMS1795710-supplement-Supp8.pdf [file NIHMS1795710-supplement-Supp8.pdf]

**Supplementary Table 1. Demographic and clinical characteristics of SLE patients and healthy controls.**

|                                  | SLE (n=71)    | HC (n=25)  |
|----------------------------------|---------------|------------|
| Age (years)                      | 32.1 ± 13.7   | 26.4 ± 3.4 |
| Female/Male                      | 64/7          | 23/2       |
| Duration of diagnosis(years)     | 4.8 ± 5.4     | /          |
| SLEDAI score                     | 8.8 ± 4.7     | /          |
| Anti-dsDNA , IU/mL <sup>a</sup>  | 284.4 ± 322.5 | /          |
| Albumin, g/L                     | 28.8 ± 8.9    | /          |
| Globulin, g/L                    | 26.9 ± 7.4    | /          |
| IgG, g/L                         | 13.5 ± 8.2    | /          |
| Serum C3 , g/L                   | 0.52 ± 0.25   | /          |
| Serum C4, g/L                    | 0.11 ± 0.08   | /          |
| Serum Creatinine, μmol/L         | 134.2 ± 168.7 | /          |
| WBC, 10 <sup>9</sup> /L          | 7.4 ± 4.2     | /          |
| Lymphocyte, 10 <sup>9</sup> /L   | 1.1 ± 0.8     | /          |
| Platelet, 10 <sup>9</sup> /L     | 203.7 ± 102.7 | /          |
| Urinary protein, g/24h           | 2.7 ± 3.4     | /          |
| Microscopic hematuria, RBC/HPF   | 13.9 ± 12.9   | /          |
| Medication (%)                   | 100%          | /          |
| Prednisone or methylprednisolone | 98.4%         | /          |
| Hydroxychloroquine               | 81.3%         | /          |
| Cyclophosphamide                 | 26%           | /          |
| Mycophenolate mofetil            | 15.6%         | /          |
| Cyclosporin A                    | 18.7%         | /          |

**Note:** All data are expressed as mean ± SD. SLE, systemic lupus erythematosus; SLEDAI, SLE Disease Activity Index; HC, health controls; WBC, White blood cells.

<sup>a</sup> Normal reference range of anti-dsDNA is **0-12** IU/ml.
