# Supplementary material
Source: PubMed Central journal article supplement (PMC9262832)
Supplement: NIHMS1795710-supplement-Supp9.pdf [file NIHMS1795710-supplement-Supp9.pdf]

**Supplementary Table 2. Demographic and clinical characteristics of SLE patients before and after 4 weeks of treatment.**

|                                 | Before (n=11) | After (n=11)     |
|---------------------------------|---------------|------------------|
| Age, years                      | 31 ± 10       | 31 ± 10          |
| Female/Male                     | 11/0          | 11/0             |
| SLEDAI score                    | 15 ± 3        | 11 ± 3***        |
| Anti-dsDNA , IU/mL <sup>a</sup> | 367.4 ± 408.1 | 106.1 ± 108.5 ** |
| Globulin, g/L                   | 24.3 ± 5.5    | 25.4 ± 6.2       |
| Albumin, g/L                    | 22.0 ± 6.2    | 26.2 ± 5.2***    |
| Serum C3, g/L                   | 0.36 ± 0.16   | 0.57 ± 0.23*     |
| WBC, 10 <sup>9</sup> /L         | 4.53 ± 1.90   | 6.39 ± 1.93**    |
| Lymphocyte, 10 <sup>9</sup> /L  | 0.64 ± 0.42   | 0.97 ± 0.33***   |
| Platelet, 10 <sup>9</sup> /L    | 129.5 ± 62.4  | 167.6 ± 60.3**   |
| Urinary proteins, g/24h         | 4.3 ± 4.2     | 2.6 ± 2.4 *      |
| Microscopic hematuria, RBC/HPF  | 20 ± 14       | 13 ± 10**        |

**Note:** All data are expressed as mean ± SD, \* $p < 0.05$ , \*\* $p < 0.01$ , \*\*\* $p < 0.001$  vs. values before treatment. <sup>a</sup> Normal reference range of anti-dsDNA is 0-12 IU/ml. All 11 patients received prednisone and hydroxychloroquine for treatment. Two patients received additional immunosuppressants. One was treated with mycophenolate and cyclosporin A. The other received cyclophosphamide.
